# Supplementary material for: Reinforcement learning for watershed and aquifer management: a nationwide view in the country of Mexico with emphasis in Baja California Sur
Source: Frontiers journal article supplement (doi:10.3389/frwa.2024.1384595), 2024-05-09
Supplement: Table_1.XLSX [file Table_1.XLSX]

## Sheet: Sheet1
Unnamed: 0_x	Acuifero	Estado	Clave_del	Unnamed: 0_y	Name	Región_hid	Shape_Leng	area_km2	NOM_ENT	MUN	NOM_MUN	LOC	NOM_LOC	POBTOT	Shortest Distance	DMA	VEAS	Necesidad (pobtot*lt)hm3	Modeling
441	0847 Los Juncos	Chihuahua	847	465	LOS JUNCOS	Río Bravo	355563	6008.06	Chihuahua	52	Ojinaga	1	Manuel Ojinaga	22066	95.6841	-697.792	831.292	0.805409
0	0901 Zona Metropolitana de la Ciudad de México	Ciudad de México	901	624	ZONA METROPOLITANA DE LA CD. DE MEXICO	Aguas del Valle de México	210370	2388.56	Ciudad de México	3	Coyoacán	1	Coyoacán	614447	1.39557	-507.23	1020.03	22.4273	40
412	0318 Laguna de Santa María	Chihuahua	318	540	CABO PULMO	Península de Baja California	136963	754.451	Baja California Sur	8	Los Cabos	1	San José del Cabo	136285	32.4636	-419.838	461.838	4.9744
408	0814 Lagunas de Tarabillas	Chihuahua	814	604	LAGUNA DE TARABILLAS	Río Bravo	233087	3250.25	Chihuahua	10	Buenaventura	5	Ejido Benito Juárez	6528	61.8809	-287.103	323.503	0.238272
418	0824 Laguna de Hormigas	Chihuahua	824	603	LAGUNA DE HORMIGAS	Río Bravo	350252	7951.31	Chihuahua	2	Aldama	1	Juan Aldama	22568	58.8184	-268.956	294.456	0.823732
465	0210 Valle de Mexicali	Baja California	210	600	VALLE DE MEXICALI	Península de Baja California	443816	6803.38	Baja California	2	Mexicali	159	Delta (Estación Delta)	5615	4.39993	-257.96	775.96	0.204948
413	0819 Laguna La Vieja	Chihuahua	819	607	LAGUNA LA VIEJA	Río Bravo	177651	2248.44	Chihuahua	10	Buenaventura	1	San Buenaventura	8253	34.0674	-217.037	294.137	0.301235
426	0832 Jiménez - Camargo	Chihuahua	832	496	JIMENEZ-CAMARGO	Río Bravo	531989	12683.2	Chihuahua	36	Jiménez	1	José Mariano Jiménez	35087	19.1497	-192.14	359.94	1.28068
393	1508 Cuautitlán - Pachuca	Estado de México	1508	619	CUAUTITLAN-PACHUCA	Aguas del Valle de México	367110	4425.11	México	84	Temascalapa	1	Temascalapa	7125	2.82819	-188.697	545.397	0.260062
425	0831 Meoqui - Delicias	Chihuahua	831	612	MEOQUI-DELICIAS	Río Bravo	396545	6233.56	Chihuahua	21	Delicias	1	Delicias	128548	12.6721	-165.038	376.238	4.692
398	0804 Buenaventura	Chihuahua	804	602	BUENAVENTURA	Río Bravo	300689	4059.91	Chihuahua	10	Buenaventura	1	San Buenaventura	8253	22.9683	-150.285	216.785	0.301235
134	0523 Principal - Región Lagunera	Coahuila	523	443	PRINCIPAL-REGION LAGUNERA	Cuencas Centrales del Norte	783711	15775.4	Coahuila de Zaragoza	33	San Pedro	22	Concordia (La Rosita)	7972	1.01206	-149.046	683.146	0.290978
397	0803 Baja Babícora	Chihuahua	803	460	BAJA BABICORA	Río Bravo	325134	5348.88	Chihuahua	31	Guerrero	1	Vicente Guerrero	7834	67.6696	-138.523	229.123	0.285941
584	2203 Valle de San Juan del Río	Querétaro	2203	180	VALLE DE SAN JUAN DEL RIO	Golfo Norte	265940	2343.18	Querétaro	16	San Juan del Río	24	Galindo (San José Galindo)	5322	1.78729	-136.262	327.762	0.194253
259	1120 Pénjamo - Abasolo	Guanajuato	1120	385	PENJAMO-ABASOLO	Lerma Santiago Pacífico	322240	2785.86	Guanajuato	23	Pénjamo	1	Pénjamo	43249	3.06911	-128.204	353.204	1.57859
597	2605 Caborca	Sonora	2605	114	CABORCA	Noroeste	579077	17842.6	Sonora	17	Caborca	1	Heroica Caborca	67604	22.2122	-120.733	333.633	2.46755
415	0821 Flores Magón - Villa Ahumada	Chihuahua	821	472	FLORES MAGON-VILLA AHUMADA	Río Bravo	390854	9039.13	Chihuahua	10	Buenaventura	5	Ejido Benito Juárez	6528	17.2464	-118.626	256.126	0.238272
254	1115 Valle de Celaya	Guanajuato	1115	373	VALLE DE CELAYA	Lerma Santiago Pacífico	244305	3231.12	Guanajuato	7	Celaya	185	Tenería del Santuario	5195	0.688638	-115.31	429.11	0.189617
392	1507 Texcoco	Estado de México	1507	264	TEXCOCO	Aguas del Valle de México	131568	1062.1	México	99	Texcoco	7	San Luis Huexotla	12327	2.00485	-111.023	245.723	0.449935
386	1501 Valle de Toluca	Estado de México	1501	623	VALLE DE TOLUCA	Lerma Santiago Pacífico	223098	3191.24	México	106	Toluca	75	San Lorenzo Tepaltitlán	35292	0.391304	-110.343	393.543	1.28816
395	0801 Ascensión	Chihuahua	801	454	ASCENSION	Río Bravo	293209	4109.96	Chihuahua	5	Ascensión	1	Ascensión	15054	8.90043	-109.057	241.257	0.549471
417	0823 Conejos - Médanos	Chihuahua	823	608	CONEJOS-MEDANOS	Río Bravo	324617	8440.72	Chihuahua	37	Juárez	1	Juárez	1501551	58.0874	-102.075	120.875	54.8066
274	0101 Valle de Aguascalientes	Aguascalientes	101	592	VALLE DE AGUASCALIENTES	Lerma Santiago Pacífico	326615	3697.5	Aguascalientes	5	Jesús María	1	Jesús María	63805	9.12239	-100.426	347.626	2.32888
555	3226 Chupaderos	Zacatecas	3226	19	CHUPADEROS	Cuencas Centrales del Norte	254667	2977.75	Zacatecas	51	Villa de Cos	8	González Ortega (Bañón)	5875	18.2139	-100.12	186.72	0.214438
611	2619 Costa de Hermosillo	Sonora	2619	130	COSTA DE HERMOSILLO	Noroeste	574739	20161.7	Sonora	30	Hermosillo	343	Miguel Alemán (La Doce)	39474	36.5491	-96.952	346.952	1.4408
593	2601 Valle de San Luis Río Colorado	Sonora	2601	601	VALLE DE SAN LUIS RIO COLORADO	Península de Baja California	302116	6071.81	Sonora	55	San Luis Río Colorado	17	Ingeniero Luis B. Sánchez	5970	33.6295	-93.356	297.656	0.217905
336	1914 Citrícola Sur	Nuevo León	1914	219	CITRICOLA SUR	Río Bravo	408321	5143.46	Nuevo León	29	Hualahuises	1	Hualahuises	5854	3.56428	-89.1986	117.199	0.213671
595	2603 Sonoyta - Puerto Peñasco	Sonora	2603	127	SONOYTA-PUERTO PEÑASCO	Noroeste	572363	12196.3	Sonora	70	General Plutarco Elías Calles	1	Sonoyta	11440	28.1736	-83.571	109.071	0.41756
543	3214 Aguanaval	Zacatecas	3214	3	AGUANAVAL	Cuencas Centrales del Norte	307665	3374.74	Zacatecas	10	Fresnillo	210	San José de Lourdes	5786	6.6197	-83.339	167.839	0.211189
427	0833 Valle de Juárez	Chihuahua	833	490	VALLE DE JUAREZ	Río Bravo	317712	4651.33	Chihuahua	37	Juárez	1	Juárez	1501551	65.2955	-76.7303	202.63	54.8066
325	1902 Sabinas -Parás	Nuevo León	1902	222	SABINAS-PARAS	Río Bravo	354513	6064.29	Nuevo León	44	Sabinas Hidalgo	1	Ciudad Sabinas Hidalgo	33522	28.1074	-76.2372	104.537	1.22355
186	1402 Toluquilla	Jalisco	1402	269	TOLUQUILLA	Lerma Santiago Pacífico	128464	730.773	Jalisco	97	Tlajomulco de Zúñiga	35	Santa Cruz del Valle	30849	1.54334	-75.6535	122.354	1.12599
507	1605 Pastor Ortíz - La Piedad	Michoacán	1605	259	PASTOR ORTIZ-LA PIEDAD	Lerma Santiago Pacífico	234640	2044.49	Michoacán de Ocampo	4	Angamacutiro	1	Angamacutiro de la Unión	5044	10.8613	-75.504	104.104	0.184106
26	1001 Valle de Santiaguillo	Durango	1001	390	VALLE DE SANTIAGUILLO	Pacífico Norte	220581	3087.96	Durango	39	Nuevo Ideal	1	Nuevo Ideal	12850	5.29087	-74.3303	115.13	0.469025
338	1916 Navidad - Potosí - Raíces	Nuevo León	1916	218	NAVIDAD-POTOSI-RAICES	Río Bravo	337146	5130.56	Nuevo León	17	Galeana	1	Galeana	7844	39.4294	-72.716	161.516	0.286306
554	3225 Calera	Zacatecas	3225	1	CALERA	Cuencas Centrales del Norte	199848	2669.78	Zacatecas	5	Calera	22	Ramón López Velarde (Toribio)	5993	5.43561	-72.573	162.473	0.218745
116	0505 General Cepeda - Sauceda	Coahuila	505	442	GENERAL CEPEDA-SAUCEDA	Cuencas Centrales del Norte	395181	4100.46	Coahuila de Zaragoza	11	General Cepeda	1	General Cepeda	5535	30.0897	-69.2741	152.174	0.202027
424	0830 Chihuahua - Sacramento	Chihuahua	830	613	CHIHUAHUA-SACRAMENTO	Río Bravo	198311	2465.27	Chihuahua	19	Chihuahua	1	Chihuahua	925762	17.5732	-68.716	125.316	33.7903
258	1119 Irapuato - Valle	Guanajuato	1119	389	IRAPUATO-VALLE	Lerma Santiago Pacífico	281862	2816.51	Guanajuato	27	Salamanca	606	Arboledas Ciudad Bajío	7064	4.59422	-67.0993	546.599	0.257836
334	1912 Citrícola Norte	Nuevo León	1912	217	CITRICOLA NORTE	Río Bravo	382395	7096.04	Nuevo León	38	Montemorelos	1	Montemorelos	54467	9.68248	-65.3906	394.191	1.98805
407	0813 Laguna Tres Castillos	Chihuahua	813	464	LAGUNA TRES CASTILLOS	Río Bravo	279710	6112.61	Chihuahua	1	Ahumada	1	Miguel Ahumada	10510	103.467	-64.2842	83.0842	0.383615
582	2201 Valle de Quéretaro	Querétaro	2201	170	VALLE DE QUERETARO	Lerma Santiago Pacífico	102397	568.379	Querétaro	14	Querétaro	236	Colinas de Santa Cruz Segunda Sección	5764	3.33475	-63.7248	129.725	0.210386
179	2101 Valle de Tecamachalco	Puebla	2101	599	VALLE DE TECAMACHALCO	Balsas	278315	3766.22	Puebla	154	Tecamachalco	27	Santiago Alseseca	9119	3.4397	-63.2311	220.331	0.332844
120	0509 La Paila	Coahuila	509	440	LA PAILA	Cuencas Centrales del Norte	526257	8601.94	Coahuila de Zaragoza	24	Parras	1	Parras de la Fuente	34798	42.9885	-63.2178	77.9178	1.27013
249	1108 Cuenca Alta del Río Laja	Guanajuato	1108	376	CUENCA ALTA DEL RIO LAJA	Lerma Santiago Pacífico	309388	4820.9	Guanajuato	14	Dolores Hidalgo Cuna de la Independencia Nacional	1	Dolores Hidalgo Cuna de la Independencia Nacional	67101	12.3639	-62.4589	202.159	2.44919
280	2402 El Barril	San Luis Potosí	2402	163	EL BARRIL	Cuencas Centrales del Norte	330720	3877.87	San Luis Potosí	49	Villa de Ramos	12	Dulce Grande	6381	20.8106	-62.0462	93.6462	0.232906
289	2411 San Luis Potosí	San Luis Potosí	2411	151	SAN LUIS POTOSI	Cuencas Centrales del Norte	203230	2441.18	San Luis Potosí	35	Soledad de Graciano Sánchez	26	Rancho Nuevo	9641	2.50215	-59.223	137.323	0.351897
401	0807 El Sauz - Encinillas	Chihuahua	807	475	EL SAUZ-ENCINILLAS	Río Bravo	257346	3617.26	Chihuahua	2	Aldama	1	Juan Aldama	22568	66.204	-58.6583	121.058	0.823732
286	2408 Villa de Arista	San Luis Potosí	2408	156	VILLA DE ARISTA	Cuencas Centrales del Norte	318579	5156.38	San Luis Potosí	22	Moctezuma	1	Moctezuma	5240	11.3589	-54.2454	102.445	0.19126
121	0510 Saltillo - Ramos Arizpe	Coahuila	510	447	SALTILLO-RAMOS ARIZPE	Río Bravo	176270	1800.2	Coahuila de Zaragoza	27	Ramos Arizpe	1	Ramos Arizpe	114010	6.8692	-54.2077	117.408	4.16136
253	1114 Río Turbio	Guanajuato	1114	383	RIO TURBIO	Lerma Santiago Pacífico	208123	1383.3	Guanajuato	8	Manuel Doblado	1	Ciudad Manuel Doblado	16092	10.4588	-53.355	163.355	0.587358
132	0521 Saltillo Sur	Coahuila	521	449	SALTILLO SUR	Cuencas Centrales del Norte	654241	9474.34	Coahuila de Zaragoza	11	General Cepeda	1	General Cepeda	5535	38.8013	-52.4762	65.8762	0.202027
49	1024 Oriente Aguanaval	Durango	1024	413	ORIENTE AGUANAVAL	Cuencas Centrales del Norte	581282	8944.01	Durango	4	Cuencamé	1	Cuencamé de Ceniceros	11585	69.0284	-52.2385	54.5385	0.422853
206	1422 Encarnación	Jalisco	1422	326	ENCARNACION	Lerma Santiago Pacífico	390823	4147.41	Jalisco	35	Encarnación de Díaz	1	Encarnación de Díaz	27833	8.37689	-51.9462	115.246	1.0159
252	1113 Valle de León	Guanajuato	1113	384	VALLE DE LEON	Lerma Santiago Pacífico	172474	1539.71	Guanajuato	20	León	451	San Juan de Abajo	7559	4.62598	-51.8761	176.376	0.275904
443	0849 Llano de Gigantes	Chihuahua	849	466	LLANO DE GIGANTES	Río Bravo	238314	3635.45	Chihuahua	62	Saucillo	1	Saucillo	10805	33.7717	-51.5519	70.3518	0.394383
558	3229 Loreto	Zacatecas	3229	21	LORETO	Cuencas Centrales del Norte	123369	817.951	Zacatecas	53	Villa González Ortega	1	Villa González Ortega	6611	14.2767	-48.9537	81.6537	0.241302
613	2621 Mesa del Seri - La Victoria	Sonora	2621	110	MESA DEL SERI-LA VICTORIA	Noroeste	162729	1380.39	Sonora	30	Hermosillo	1	Hermosillo	855563	18.1827	-47.626	104.626	31.228
430	0836 Aldama - San Diego	Chihuahua	836	610	ALDAMA-SAN DIEGO	Río Bravo	166635	2113.79	Chihuahua	4	Aquiles Serdán	1	Santa Eulalia	20042	19.7297	-47.5481	108.548	0.731533
30	1005 Madero - Victoria	Durango	1005	394	MADERO-VICTORIA	Pacífico Norte	191428	2088.11	Durango	8	Guadalupe Victoria	1	Guadalupe Victoria	18696	10.0693	-46.9546	67.3546	0.682404
402	0808 Janos	Chihuahua	808	462	JANOS	Río Bravo	378481	8260.3	Chihuahua	5	Ascensión	1	Ascensión	15054	55.5782	-44.4785	170.779	0.549471
434	0840 Villalba	Chihuahua	840	611	VILLALBA	Río Bravo	170813	2470.65	Chihuahua	45	Meoqui	15	Lázaro Cárdenas	9839	26.5931	-43.8207	56.9207	0.359123
119	0508 Paredón	Coahuila	508	446	PAREDON	Río Bravo	321632	7884.05	Coahuila de Zaragoza	27	Ramos Arizpe	1	Ramos Arizpe	114010	50.6697	-43.0869	63.3869	4.16136
449	0855 Laguna Los Alazanes	Chihuahua	855	494	LAGUNA LOS ALAZANES	Río Bravo	381187	5729	Chihuahua	62	Saucillo	1	Saucillo	10805	116.857	-41.0723	68.5723	0.394383
291	2413 Matehuala - Huizache	San Luis Potosí	2413	159	MATEHUALA-HUIZACHE	Cuencas Centrales del Norte	334084	5026.96	San Luis Potosí	15	Charcas	1	Charcas	14117	51.308	-41.038	72.538	0.51527
29	1004 Vicente Guerrero - Poanas	Durango	1004	395	VICENTE GUERRERO-POANAS	Pacífico Norte	340223	4543.93	Durango	22	Poanas	1	Villa Unión	11509	11.982	-40.7007	123.801	0.420079
257	1118 Salvatierra - Acámbaro	Guanajuato	1118	377	SALVATIERRA-ACAMBARO	Lerma Santiago Pacífico	151289	860.273	Guanajuato	28	Salvatierra	64	Urireo	9383	4.69643	-39.8616	68.2616	0.342479
305	2504 Río Culiacán	Sinaloa	2504	137	RIO CULIACAN	Pacífico Norte	864640	25270.3	Sinaloa	6	Culiacán	1	Culiacán Rosales	808416	58.4672	-39.6771	283.177	29.5072
192	1408 La Barca	Jalisco	1408	300	LA BARCA	Lerma Santiago Pacífico	195849	1349.58	Jalisco	13	Atotonilco el Alto	145	Vistas del Maguey [Fraccionamiento]	6073	14.8089	-39.6237	103.824	0.221664
122	0511 Región Manzanera - Zapalinamé	Coahuila	511	445	REGION MANZANERA-ZAPALINAME	Río Bravo	219898	1796.26	Coahuila de Zaragoza	4	Arteaga	1	Arteaga	15534	27.0641	-38.4164	90.0164	0.566991
476	0221 San Quintín	Baja California	221	550	SAN QUINTIN	Península de Baja California	147976	1282.92	Baja California	6	San Quintín	585	Lázaro Cárdenas	18829	11.4176	-36.7021	61.0021	0.687258
118	0507 Monclova	Coahuila	507	432	MONCLOVA	Río Bravo	817575	17346.9	Coahuila de Zaragoza	20	Múzquiz	70	Minas de Barroterán	7746	41.364	-36.6877	156.888	0.282729
346	1924 El Carmen - Salinas -Victoria	Nuevo León	1924	206	EL CARMEN-SALINAS-VICTORIA	Río Bravo	400180	4496.13	Nuevo León	12	Ciénega de Flores	1	Ciénega de Flores	30217	3.39986	-35.8618	83.5618	1.10292
112	0501 Allende - Piedras Negras	Coahuila	501	650	ALLENDE-PIEDRAS NEGRAS	Río Bravo	364933	16844.3	Coahuila de Zaragoza	38	Zaragoza	1	Zaragoza	11150	9.61459	-35.2218	257.322	0.406975
428	0834 Parral - Valle del Verano	Chihuahua	834	489	PARRAL-VALLE DEL VERANO	Río Bravo	178401	1849.71	Chihuahua	32	Hidalgo del Parral	1	Hidalgo del Parral	113843	7.64279	-34.1518	60.8518	4.15527
311	2510 Río Baluarte	Sinaloa	2510	146	RIO BALUARTE	Pacífico Norte	363620	6729.41	Sinaloa	14	Rosario	1	El Rosario	17097	31.6361	-32.7681	91.6681	0.62404
194	1410 Lagos de Moreno	Jalisco	1410	304	LAGOS DE MORENO	Lerma Santiago Pacífico	358912	3454.71	Jalisco	53	Lagos de Moreno	1	Lagos de Moreno	111569	10.0223	-32.1117	228.112	4.07227
123	0512 Región Carbonífera	Coahuila	512	648	REGION CARBONIFERA	Río Bravo	657760	20255.2	Coahuila de Zaragoza	20	Múzquiz	93	Palaú	17594	9.51987	-32.0377	77.0377	0.642181
246	1104 Laguna seca	Guanajuato	1104	372	LAGUNA SECA	Lerma Santiago Pacífico	172823	1541.98	Guanajuato	33	San Luis de la Paz	1	San Luis de la Paz	51894	11.5311	-31.8461	160.346	1.89413
281	2403 Salinas de Hidalgo	San Luis Potosí	2403	157	SALINAS DE HIDALGO	Cuencas Centrales del Norte	153550	1199.29	San Luis Potosí	25	Salinas	1	Salinas de Hidalgo	18586	4.12698	-31.8107	48.5107	0.678389
193	1409 Ameca	Jalisco	1409	311	AMECA	Lerma Santiago Pacífico	324434	4331.31	Jalisco	3	Ahualulco de Mercado	1	Ahualulco de Mercado	17000	9.43771	-30.3764	286.776	0.6205
145	0306 Santo Domingo	Baja California Sur	306	513	SANTO DOMINGO	Península de Baja California	562711	17257.9	Baja California Sur	1	Comondú	1	Ciudad Constitución	43805	12.3968	-30.3714	176.771	1.59888
472	0217 San Rafael	Baja California	217	578	SAN RAFAEL	Península de Baja California	218919	1714.17	Baja California	6	San Quintín	40	Camalú	11272	36.0545	-29.9002	42.3002	0.411428
18	2807 Victoria - Guemez	Tamaulipas	2807	615	VICTORIA-GUEMEZ	Golfo Norte	208888	2317.62	Tamaulipas	16	Hidalgo	145	Estación Santa Engracia	6121	13.9328	-28.768	107.968	0.223416
27	1002 Valle de Canatlán	Durango	1002	393	VALLE DE CANATLAN	Pacífico Norte	211639	3116.12	Durango	1	Canatlán	1	Canatlán	11943	12.3611	-27.8681	65.7681	0.43592
400	0806 Casas Grandes	Chihuahua	806	455	CASAS GRANDES	Río Bravo	333951	6869.63	Chihuahua	13	Casas Grandes	1	Casas Grandes	7134	9.67181	-27.0548	207.055	0.260391
247	1106 Dr. Mora - San José Iturbide	Guanajuato	1106	388	DR. MORA-SAN JOSE DE ITURBIDE	Lerma Santiago Pacífico	123978	912.049	Guanajuato	32	San José Iturbide	1	San José Iturbide	27593	4.81263	-27.0196	65.4196	1.00714
190	1406 Ciudad Guzmán	Jalisco	1406	297	CIUDAD GUZMAN	Lerma Santiago Pacífico	363341	3967.5	Jalisco	108	Tuxpan	1	Tuxpan	30471	7.43912	-26.289	276.389	1.11219
475	0220 Colonia Vicente Guerrero	Baja California	220	551	COLONIA VICENTE GUERRERO	Península de Baja California	185841	1498.5	Baja California	6	San Quintín	863	Vicente Guerrero	13876	34.6341	-26.1218	40.6218	0.506474
571	3008 Cotaxtla	Veracruz	3008	47	COTAXTLA	Golfo Centro	344518	3666.53	Veracruz de Ignacio de la Llave	125	Paso del Macho	1	Paso del Macho	14582	15.8431	-25.6805	211.581	0.532243
391	1506 Chalco - Amecameca	Estado de México	1506	265	CHALCO-AMECAMECA	Aguas del Valle de México	192922	1068.06	México	25	Chalco	17	San Mateo Tezoquipan Miraflores	10698	3.22587	-25.4223	99.4223	0.390477
28	1003 Valle del Guadiana	Durango	1003	392	VALLE DEL GUADIANA	Pacífico Norte	364445	5858.24	Durango	5	Durango	1	Victoria de Durango	616068	7.63999	-23.9037	148.404	22.4865
511	1609 Briseñas - Yurécuaro	Michoacán	1609	253	BRISEÑAS-YURECUARO	Lerma Santiago Pacífico	156467	637.856	Michoacán de Ocampo	86	Tanhuato	1	Tanhuato de Guerrero	8707	0.457581	-23.407	135.407	0.317806
583	2202 Valle de Amazcala	Querétaro	2202	177	VALLE DE AMAZCALA	Lerma Santiago Pacífico	125370	696.705	Querétaro	11	El Marqués	67	Santa Cruz	5076	8.43988	-23.247	54.447	0.185274
48	1023 Ceballos	Durango	1023	415	CEBALLOS	Cuencas Centrales del Norte	491987	11969.1	Durango	13	Mapimí	1	Mapimí	6617	52.8727	-23.0148	74.6148	0.24152
295	2417 Santa María del Río	San Luis Potosí	2417	165	SANTA MARIA DEL RIO	Golfo Norte	347325	3656.14	San Luis Potosí	32	Santa María del Río	1	Santa María del Río	14340	24.3418	-22.9518	26.6518	0.52341
115	0504 Cuatrociénegas - Ocampo	Coahuila	504	431	CUATROCIENEGAS-OCAMPO	Río Bravo	378835	8256.44	Coahuila de Zaragoza	7	Cuatro Ciénegas	1	Cuatro Ciénegas de Carranza	10395	63.619	-22.4113	73.9113	0.379418
94	2008 Ostuta	Oaxaca	2008	198	OSTUTA	Pacífico Sur	313940	4118.34	Oaxaca	525	Santo Domingo Zanatepec	1	Santo Domingo Zanatepec	7900	10.3259	-21.4945	12.7394	0.28835
304	2503 Río Mocorito	Sinaloa	2503	138	RIO MOCORITO	Pacífico Norte	318420	5578.84	Sinaloa	15	Salvador Alvarado	1	Guamúchil	65215	15.3992	-20.9576	113.858	2.38035
366	1317 Valle de Tulancingo	Hidalgo	1317	329	VALLE DE TULANCINGO	Golfo Norte	151278	1210.81	Hidalgo	77	Tulancingo de Bravo	1	Tulancingo	106163	3.5427	-20.9354	74.5354	3.87495
313	2512 Laguna Agua Grande	Sinaloa	2512	145	LAGUNA AGUA GRANDE	Pacífico Norte	108250	471.232	Sinaloa	9	Escuinapa	34	Isla del Bosque	8145	10.7183	-20.8737	65.9737	0.297293
419	0825 El Sabinal	Chihuahua	825	473	EL SABINAL	Río Bravo	197608	2486.26	Chihuahua	5	Ascensión	1	Ascensión	15054	44.808	-20.6107	58.1107	0.549471
91	2004 Jamiltepec	Oaxaca	2004	190	JAMILTEPEC	Pacífico Sur	664738	13103.3	Oaxaca	272	San Miguel Panixtlahuaca	1	San Miguel Panixtlahuaca	5890	47.9441	-20.3002	15.4326	0.214985
580	3019 Cuenca Río Papaloapan	Veracruz	3019	39	CUENCA RIO PAPALOAPAN	Golfo Centro	674940	8098.6	Veracruz de Ignacio de la Llave	77	Isla	1	Isla	25608	11.0599	-19.9772	98.9772	0.934692
104	2018 Pinotepa Nacional	Oaxaca	2018	194	PINOTEPA NACIONAL	Pacífico Sur	267813	2362.81	Oaxaca	482	Santiago Pinotepa Nacional	1	Santiago Pinotepa Nacional	33726	2.93851	-19.7082	28.422	1.231
462	0207 Guadalupe	Baja California	207	547	GUADALUPE	Península de Baja California	178960	1347.98	Baja California	1	Ensenada	247	El Sauzal de Rodríguez	11371	36.4096	-18.4151	37.1151	0.415042
403	0809 Laguna de Mexicanos	Chihuahua	809	458	LAGUNA DE MEXICANOS	Río Bravo	129253	1242.69	Chihuahua	17	Cuauhtémoc	1	Cuauhtémoc	135586	29.0912	-18.4127	53.5127	4.94889
278	0105 Valle de Calvillo	Aguascalientes	105	591	VALLE DE CALVILLO	Lerma Santiago Pacífico	151886	1236.45	Aguascalientes	3	Calvillo	55	Ojocaliente	7318	5.7151	-17.9097	40.9097	0.267107
541	3212 Ojocaliente	Zacatecas	3212	15	OJOCALIENTE	Lerma Santiago Pacífico	238309	1935.73	Zacatecas	8	Cuauhtémoc	1	San Pedro Piedra Gorda	9463	5.87234	-17.8556	65.7556	0.3454
243	1459 Jesús María	Jalisco	1459	301	JESUS MARIA	Lerma Santiago Pacífico	168086	851.813	Jalisco	48	Jesús María	1	Jesús María	9436	9.69287	-16.6746	33.0746	0.344414
416	0822 Santa Clara	Chihuahua	822	456	SANTA CLARA	Río Bravo	320726	6073.74	Chihuahua	10	Buenaventura	1	San Buenaventura	8253	75.8519	-16.4927	39.8927	0.301235
187	1403 Cajititlán	Jalisco	1403	270	CAJITITLAN	Lerma Santiago Pacífico	105238	652.651	Jalisco	97	Tlajomulco de Zúñiga	5	Cajititlán	17818	4.32896	-16.2178	63.3178	0.650357
128	0517 Laguna El Guaje	Coahuila	517	441	LAGUNA EL GUAJE	Río Bravo	462472	12413.5	Coahuila de Zaragoza	7	Cuatro Ciénegas	1	Cuatro Ciénegas de Carranza	10395	148.905	-15.4346	31.1346	0.379418
309	2508 Río Quelite	Sinaloa	2508	143	RIO QUELITE	Pacífico Norte	173093	1656.26	Sinaloa	12	Mazatlán	1	Mazatlán	441975	42.2892	-15.4058	32.6058	16.1321
438	0844 Valle de Zaragoza	Chihuahua	844	470	VALLE DE ZARAGOZA	Río Bravo	252312	5172.99	Chihuahua	32	Hidalgo del Parral	1	Hidalgo del Parral	113843	52.1229	-15.0594	18.6594	4.15527
310	2509 Río Presidio	Sinaloa	2509	144	RIO PRESIDIO	Pacífico Norte	540337	9211.26	Durango	23	Pueblo Nuevo	1	El Salto	26678	41.8981	-14.6511	112.151	0.973747
356	1307 Huichapan - Tecozautla	Hidalgo	1307	338	HUICHAPAN-TECOZAUTLA	Golfo Norte	187339	1670.64	Hidalgo	29	Huichapan	1	Huichapan	9853	4.49475	-14.5507	37.7507	0.359635
156	0317 Cabo San Lucas	Baja California Sur	317	541	CABO SAN LUCAS	Península de Baja California	106410	617.648	Baja California Sur	8	Los Cabos	54	Cabo San Lucas	202694	10.1913	-14.4813	14.9813	7.39833
432	0838 Alto Río San Pedro	Chihuahua	838	609	ALTO RIO SAN PEDRO	Río Bravo	536087	12856.5	Chihuahua	17	Cuauhtémoc	5	Colonia Anáhuac	10196	58.9479	-14.3913	41.5913	0.372154
618	2626 Río Zanjón	Sonora	2626	76	RIO ZANJON	Noroeste	327025	5937.64	Sonora	56	San Miguel de Horcasitas	27	Pesqueira	9442	46.274	-14.168	101.168	0.344633
473	0218 San Telmo	Baja California	218	554	SAN TELMO	Península de Baja California	187405	1747.04	Baja California	6	San Quintín	40	Camalú	11272	23.7801	-14.1568	22.6568	0.411428
189	1405 Ocotlán	Jalisco	1405	283	OCOTLAN	Lerma Santiago Pacífico	247540	2407.23	Jalisco	13	Atotonilco el Alto	30	San Francisco de Asís	5952	3.52281	-14.0192	91.3192	0.217248
628	2636 San José de Guaymas	Sonora	2636	117	SAN JOSE DE GUAYMAS	Noroeste	204160	1564.95	Sonora	29	Guaymas	1	Heroica Guaymas	117253	19.4771	-14.0014	18.5014	4.27973
404	0810 Samalayuca	Chihuahua	810	457	SAMALAYUCA	Río Bravo	110921	854.791	Chihuahua	37	Juárez	1	Juárez	1501551	49.0145	-13.6632	29.7632	54.8066
569	3006 Costera de Veracruz	Veracruz	3006	50	COSTERA DE VERACRUZ	Golfo Centro	339277	3468.01	Veracruz de Ignacio de la Llave	65	Emiliano Zapata	46	Rinconada	8005	16.6179	-13.6178	204.618	0.292183
324	1901 Lampazos - Villaldama	Nuevo León	1901	220	LAMPAZOS-VILLALDAMA	Río Bravo	230287	2636.36	Nuevo León	44	Sabinas Hidalgo	1	Ciudad Sabinas Hidalgo	33522	25.6125	-13.284	25.784	1.22355
567	3004 Perote - Zalayeta	Veracruz	3004	48	PEROTE-ZALAYETA	Golfo Centro	175184	1158.12	Veracruz de Ignacio de la Llave	128	Perote	1	Perote	42451	3.50889	-12.8694	52.2694	1.54946
197	1413 Altos de Jalisco	Jalisco	1413	293	ALTOS DE JALISCO	Lerma Santiago Pacífico	254151	1744.26	Jalisco	1	Acatic	1	Acatic	13033	10.4509	-12.4504	74.1504	0.475704
585	2204 Valle de Buenavista	Querétaro	2204	171	VALLE DE BUENAVISTA	Lerma Santiago Pacífico	89013.7	361.642	Querétaro	14	Querétaro	75	Pie de Gallo	5069	5.20957	-12.4399	23.3399	0.185019
185	1401 Atemajac	Jalisco	1401	268	ATEMAJAC	Lerma Santiago Pacífico	116941	850.067	Jalisco	120	Zapopan	1	Zapopan	1257547	2.979	-12.0383	133.638	45.9005
275	0102 Valle de Chicalote	Aguascalientes	102	590	VALLE DE CHICALOTE	Lerma Santiago Pacífico	170865	856.924	Aguascalientes	2	Asientos	59	Villa Juárez	5976	1.09838	-11.905	46.905	0.218124
139	0528 Cuatrociénegas	Coahuila	528	430	CUATROCIENEGAS	Río Bravo	322025	4440.59	Coahuila de Zaragoza	7	Cuatro Ciénegas	1	Cuatro Ciénegas de Carranza	10395	21.2892	-11.6788	24.4788	0.379418
251	1111 La Muralla	Guanajuato	1111	379	LA MURALLA	Lerma Santiago Pacífico	87508.9	280.22	Guanajuato	31	San Francisco del Rincón	1	San Francisco del Rincón	79772	22.0602	-11.5961	41.3961	2.91168
328	1906 Área Metropolitana de Monterrey	Nuevo León	1906	216	AREA METROPOLITANA DE MONTERREY	Río Bravo	151283	1129.93	Nuevo León	26	Guadalupe	1	Guadalupe	635862	1.35236	-11.5129	109.413	23.209
510	1608 Zamora	Michoacán	1608	244	ZAMORA	Lerma Santiago Pacífico	217832	3239.45	Michoacán de Ocampo	85	Tangancícuaro	1	Tangancícuaro de Arista	15414	6.74615	-11.4684	139.768	0.562611
627	2635 Valle de Guaymas	Sonora	2635	75	VALLE DE GUAYMAS	Noroeste	422043	8772.35	Sonora	25	Empalme	1	Empalme	38886	57.4465	-11.351	111.351	1.41934
559	3230 Villa Hidalgo	Zacatecas	3230	18	VILLA HIDALGO	Cuencas Centrales del Norte	176788	1019.59	Zacatecas	53	Villa González Ortega	1	Villa González Ortega	6611	20.2492	-11.1734	52.1734	0.241302
199	1415 Jalostitlán	Jalisco	1415	278	JALOSTOTITLAN	Lerma Santiago Pacífico	171762	1435.32	Jalisco	78	San Miguel el Alto	1	San Miguel el Alto	25925	7.14619	-10.74	69.74	0.946263
612	2620 Sahuaral	Sonora	2620	128	SAHUARAL	Noroeste	228483	1943.97	Sonora	29	Guaymas	1	Heroica Guaymas	117253	53.1992	-10.6944	69.2944	4.27973
552	3223 Guadalupe de Las Corrientes	Zacatecas	3223	4	GUADALUPE DE LAS CORRIENTES	Cuencas Centrales del Norte	317260	5617.19	Zacatecas	6	Cañitas de Felipe Pescador	1	Cañitas de Felipe Pescador	6378	30.5202	-10.3513	43.1513	0.232797
339	1917 Sandía - La Unión	Nuevo León	1917	224	SANDIA-LA UNION	Río Bravo	298346	3677.15	Nuevo León	14	Doctor Arroyo	1	Doctor Arroyo	11822	36.2136	-10.3504	36.1504	0.431503
505	1602 Morelia - Queréndaro	Michoacán	1602	260	MORELIA-QUERENDARO	Lerma Santiago Pacífico	334461	4011.52	Michoacán de Ocampo	88	Tarímbaro	1	Tarímbaro	6853	4.33971	-10.205	169.005	0.250134
557	3228 La Blanca	Zacatecas	3228	16	LA BLANCA	Cuencas Centrales del Norte	130143	677.065	Zacatecas	36	Ojocaliente	1	Ojocaliente	22295	19.7336	-10.008	29.008	0.813767
248	1107 San Miguel de Allende	Guanajuato	1107	381	SAN MIGUEL DE ALLENDE	Lerma Santiago Pacífico	75239.9	416.246	Guanajuato	3	San Miguel de Allende	1	San Miguel de Allende	72452	9.54286	-9.90401	32.004	2.6445
429	0835 Tabalaopa - Aldama	Chihuahua	835	614	TABALAOPA-ALDAMA	Río Bravo	130324	951.243	Chihuahua	2	Aldama	1	Juan Aldama	22568	13.4136	-9.62304	81.823	0.823732
604	2612 Magdalena	Sonora	2612	82	MAGDALENA	Noroeste	404123	3458.6	Sonora	58	Santa Ana	1	Santa Ana	12372	8.35282	-9.3672	50.6672	0.451578
421	0827 El Cuarenta	Chihuahua	827	476	EL CUARENTA	Río Bravo	163684	1327.22	Chihuahua	1	Ahumada	1	Miguel Ahumada	10510	55.8433	-9.06423	12.6642	0.383615
220	1436 Arenal	Jalisco	1436	276	ARENAL	Lerma Santiago Pacífico	154454	984.23	Jalisco	120	Zapopan	231	Tesistán (San Francisco Tesistán)	91631	12.1493	-8.75443	29.3544	3.34453
553	3224 Puerto Madero	Zacatecas	3224	9	PUERTO MADERO	Cuencas Centrales del Norte	260681	2333.65	Zacatecas	51	Villa de Cos	1	Villa de Cos	5928	43.7143	-8.739	25.239	0.216372
534	3205 Jeréz	Zacatecas	3205	24	JEREZ	Lerma Santiago Pacífico	259456	2856.01	Zacatecas	20	Jerez	1	Jerez de García Salinas	46132	5.64801	-8.5837	54.0837	1.68382
602	2610 Coyotillo	Sonora	2610	84	COYOTILLO	Noroeste	172764	1413.47	Sonora	58	Santa Ana	1	Santa Ana	12372	15.418	-8.4893	12.4893	0.451578
236	1452 Unión de Guadalupe	Jalisco	1452	280	UNION DE GUADALUPE	Lerma Santiago Pacífico	52288.3	160.583	Jalisco	14	Atoyac	1	Atoyac	5389	9.13096	-8.4237	15.0237	0.196698
163	0324 La Paz	Baja California Sur	324	644	LA PAZ	Península de Baja California	187544	1692.17	Baja California Sur	3	La Paz	1	La Paz	250141	13.529	-7.82832	35.6283	9.13015
330	1908 Campo Mina	Nuevo León	1908	208	CAMPO MINA	Río Bravo	121107	1060.16	Nuevo León	37	Mina	1	Mina	5277	7.43271	-7.8148	31.8148	0.19261
399	0805 Cuauhtémoc	Chihuahua	805	459	CUAUHTEMOC	Río Bravo	286528	4447.07	Chihuahua	17	Cuauhtémoc	5	Colonia Anáhuac	10196	25.8576	-7.64785	307.048	0.372154
466	0211 Ensenada	Baja California	211	576	ENSENADA	Península de Baja California	150718	1036.31	Baja California	1	Ensenada	247	El Sauzal de Rodríguez	11371	12.4357	-7.0753	10.7753	0.415042
608	2616 Río San Pedro	Sonora	2616	124	RIO SAN PEDRO	Noroeste	186275	2381	Sonora	19	Cananea	1	Heroica Ciudad de Cananea	38113	23.5037	-6.9789	30.9789	1.39112
228	1444 San Diego de Alejandría	Jalisco	1444	303	SAN DIEGO DE ALEJANDRIA	Lerma Santiago Pacífico	201730	1015.74	Jalisco	72	San Diego de Alejandría	1	San Diego de Alejandría	6025	7.45257	-6.5443	43.0443	0.219913
474	0219 Camalú	Baja California	219	549	CAMALU	Península de Baja California	69739.4	333.393	Baja California	6	San Quintín	40	Camalú	11272	8.34015	-6.3342	14.1342	0.411428
283	2405 Ahualulco	San Luis Potosí	2405	152	AHUALULCO	Cuencas Centrales del Norte	140758	1125.74	San Luis Potosí	1	Ahualulco	1	Ahualulco del Sonido 13	5249	5.60126	-6.31457	17.2146	0.191588
51	1026 Vicente Suárez	Durango	1026	398	VICENTE SUAREZ	Cuencas Centrales del Norte	143674	1461.88	Durango	13	Mapimí	1	Mapimí	6617	13.4529	-6.2657	11.0657	0.24152
164	0325 El Coyote	Baja California Sur	325	521	EL COYOTE	Península de Baja California	91523	327.277	Baja California Sur	3	La Paz	1	La Paz	250141	13.358	-6.10876	6.80876	9.13015
262	1801 Valle Acaponeta - Cañas	Nayarit	1801	233	VALLE ACAPONETA-CAÑAS	Pacífico Norte	661916	11784	Nayarit	1	Acaponeta	1	Acaponeta	19976	46.2217	-5.89726	25.8973	0.729124
329	1907 Campo Buenos Aires	Nuevo León	1907	210	CAMPO BUENOS AIRES	Río Bravo	156209	1140.54	Nuevo León	19	San Pedro Garza García	1	San Pedro Garza García	132128	20.0157	-5.8004	62.8004	4.82267
276	0103 El Llano	Aguascalientes	103	593	EL LLANO	Lerma Santiago Pacífico	135443	654.202	Aguascalientes	10	El Llano	1	Palo Alto	6307	10.3638	-5.7644	17.7644	0.230206
471	0216 La Trinidad	Baja California	216	545	LA TRINIDAD	Península de Baja California	174368	1655.17	Baja California	1	Ensenada	243	San Vicente	5068	54.778	-5.5512	27.9512	0.184982
214	1430 La Huerta	Jalisco	1430	287	LA HUERTA	Lerma Santiago Pacífico	187710	1732.11	Jalisco	68	Villa Purificación	1	Villa Purificación	5965	7.92679	-5.31051	61.7105	0.217723
158	0319 San José del Cabo	Baja California Sur	319	514	SAN JOSE DEL CABO	Península de Baja California	161965	1545	Baja California Sur	8	Los Cabos	1	San José del Cabo	136285	22.0835	-5.25647	30.3565	4.9744
470	0215 Cañón La Calentura	Baja California	215	563	CAÑON LA CALENTURA	Península de Baja California	145152	879.076	Baja California	1	Ensenada	243	San Vicente	5068	15.7822	-5.2514	14.5514	0.184982
117	0506 El Hundido	Coahuila	506	433	EL HUNDIDO	Río Bravo	255700	4039.89	Coahuila de Zaragoza	7	Cuatro Ciénegas	1	Cuatro Ciénegas de Carranza	10395	63.2256	-5.15656	25.2566	0.379418
201	1417 Autlán	Jalisco	1417	296	AUTLAN	Lerma Santiago Pacífico	374690	5338.22	Jalisco	113	San Gabriel	1	San Gabriel	5109	23.4209	-5.08773	81.0877	0.186478
46	1021 Pedriceña - Velardeña	Durango	1021	411	PEDRICEÑA-VELARDEÑA	Cuencas Centrales del Norte	315760	3669.96	Durango	4	Cuencamé	1	Cuencamé de Ceniceros	11585	5.48713	-5.01386	15.9139	0.422853
463	0208 Ojos Negros	Baja California	208	544	OJOS NEGROS	Península de Baja California	117383	905.02	Baja California	1	Ensenada	2183	Rancho Cañón Buena Vista (El Zorrillo)	8522	45.4145	-4.7463	27.0463	0.311053
467	0212 Maneadero	Baja California	212	548	MANEADERO	Península de Baja California	208152	2012.77	Baja California	1	Ensenada	2183	Rancho Cañón Buena Vista (El Zorrillo)	8522	15.4752	-4.71205	38.5121	0.311053
162	0323 Los Planes	Baja California Sur	323	520	LOS PLANES	Península de Baja California	161133	1231.54	Baja California Sur	3	La Paz	1	La Paz	250141	39.2332	-4.69969	13.0997	9.13015
279	2401 Vanegas - Catorce	San Luis Potosí	2401	154	VANEGAS-CATORCE	Cuencas Centrales del Norte	354294	5319.54	San Luis Potosí	7	Cedral	1	Cedral	12807	22.7386	-4.645	33.945	0.467456
468	0213 Santo Tomás	Baja California	213	562	SANTO TOMAS	Península de Baja California	165511	1212.86	Baja California	1	Ensenada	2183	Rancho Cañón Buena Vista (El Zorrillo)	8522	20.5761	-4.6201	10.9201	0.311053
365	1316 Tepejí del Río	Hidalgo	1316	622	TEPEJI DEL RIO	Aguas del Valle de México	113528	461.526	México	112	Villa del Carbón	1	Villa del Carbón	9598	7.92504	-4.53953	15.6395	0.350327
308	2507 Río Piaxtla	Sinaloa	2507	136	RIO PIAXTLA	Pacífico Norte	477627	8546.12	Durango	26	San Dimas	1	Tayoltita	5817	18.2926	-4.3623	53.6623	0.21232
619	2627 Río Bacoachi	Sonora	2627	89	RIO BACOACHI	Noroeste	259755	3137.03	Sonora	27	Fronteras	45	Esqueda	7240	41.7757	-4.18268	28.2827	0.26426
135	0524 Acatita	Coahuila	524	437	ACATITA	Cuencas Centrales del Norte	188381	2391.34	Durango	36	Tlahualilo	1	Tlahualilo de Zaragoza	9101	54.2317	-4.02101	9.42101	0.332186
131	0520 Laguna del Rey-Sierra Mojada	Coahuila	520	450	LAGUNA DEL REY-SIERRA MOJADA	Cuencas Centrales del Norte	259096	3950.88	Durango	36	Tlahualilo	1	Tlahualilo de Zaragoza	9101	99.4434	-3.96432	15.3643	0.332186
588	2207 Tolimán	Querétaro	2207	178	TOLIMAN	Golfo Norte	338394	3436.77	Querétaro	18	Tolimán	1	Tolimán	6290	15.7532	-3.95912	9.45912	0.229585
589	2208 Valle de Huimilpan	Querétaro	2208	172	VALLE DE HUIMILPAN	Lerma Santiago Pacífico	102630	501.336	Querétaro	6	Corregidora	17	La Negreta	16451	16.6853	-3.91478	21.9148	0.600461
389	1504 Tenancingo	Estado de México	1504	267	TENANCINGO	Balsas	251776	2587.1	México	113	Villa Guerrero	1	Villa Guerrero	10336	4.95843	-3.82151	19.2215	0.377264
211	1427 Puerto Vallarta	Jalisco	1427	322	PUERTO VALLARTA	Lerma Santiago Pacífico	212636	2100.34	Jalisco	67	Puerto Vallarta	28	Ixtapa	39083	16.2155	-3.71219	73.2122	1.42653
130	0519 Castaños	Coahuila	519	444	CASTAÑOS	Río Bravo	388773	6425.58	Coahuila de Zaragoza	6	Castaños	1	Castaños	27314	39.0882	-3.69135	17.4914	0.996961
406	0812 Palomas - Guadalupe Victoria	Chihuahua	812	480	PALOMAS-GUADALUPE VICTORIA	Río Bravo	219160	2520.36	Chihuahua	5	Ascensión	68	Puerto Palomas de Villa	6054	36.3275	-3.3961	16.0961	0.220971
539	3210 Benito Juárez	Zacatecas	3210	2	BENITO JUAREZ	Cuencas Centrales del Norte	83285.3	418.024	Zacatecas	56	Zacatecas	1	Zacatecas	138444	16.7719	-3.3865	21.4865	5.05321
200	1416 Valle de Guadalupe	Jalisco	1416	277	VALLE DE GUADALUPE	Lerma Santiago Pacífico	161887	1140.28	Jalisco	93	Tepatitlán de Morelos	58	Capilla de Guadalupe	15640	18.7853	-3.28155	33.1816	0.57086
601	2609 Busani	Sonora	2609	85	BUSANI	Noroeste	207110	1711.91	Sonora	58	Santa Ana	1	Santa Ana	12372	29.5466	-3.224	18.724	0.451578
6	0609 Santiago - Salagua	Colima	609	420	SANTIAGO-SALAGUA	Lerma Santiago Pacífico	95623.8	296.852	Colima	7	Manzanillo	21	El Colomo	9664	12.5212	-3.0732	21.5732	0.352736
229	1445 San José de las Pilas	Jalisco	1445	302	SAN JOSE DE LAS PILAS	Lerma Santiago Pacífico	156309	533.232	Jalisco	48	Jesús María	1	Jesús María	9436	17.2722	-3.05772	15.0577	0.344414
568	3005 Valle Actopan	Veracruz	3005	37	VALLE DE ACTOPAN	Golfo Centro	270479	2856.54	Veracruz de Ignacio de la Llave	9	Alto Lucero de Gutiérrez Barrios	1	Alto Lucero	5238	11.3026	-3.03648	85.1365	0.191187
142	0303 San Ignacio	Baja California Sur	303	535	SAN IGNACIO	Península de Baja California	496425	14624.5	Baja California Sur	2	Mulegé	1	Santa Rosalía	14357	69.2739	-3.01607	7.91607	0.52403
501	0246 San Simón	Baja California	246	579	SAN SIMON	Península de Baja California	204557	2649.22	Baja California	6	San Quintín	585	Lázaro Cárdenas	18829	37.4024	-2.942	26.842	0.687258
314	2513 Río Cañas	Sinaloa	2513	139	RIO CAÑAS	Pacífico Norte	135393	694.025	Nayarit	1	Acaponeta	1	Acaponeta	19976	28.5994	-2.90626	17.9063	0.729124
198	1414 Tepatitlán	Jalisco	1414	294	TEPATITLAN	Lerma Santiago Pacífico	99944.2	522.815	Jalisco	93	Tepatitlán de Morelos	1	Tepatitlán de Morelos	98842	5.73968	-2.86671	43.7667	3.60773
544	3215 Ábrego	Zacatecas	3215	6	ABREGO	Cuencas Centrales del Norte	173476	1450.63	Zacatecas	40	Sain Alto	1	Sain Alto	5295	34.6455	-2.857	19.657	0.193268
42	1017 Valle del Mezquital	Durango	1017	391	VALLE DEL MEZQUITAL	Pacífico Norte	244955	2724.24	Durango	16	Nombre de Dios	1	Nombre de Dios	5953	41.6539	-2.83184	3.93184	0.217284
113	0502 Cañón del Derramadero	Coahuila	502	436	CAÑON DEL DERRAMADERO	Río Bravo	144765	1171.54	Coahuila de Zaragoza	30	Saltillo	1	Saltillo	864431	26.2076	-2.77248	29.2725	31.5517
448	0854 Rancho Dentón	Chihuahua	854	483	RANCHO DENTON	Río Bravo	225181	2727.63	Chihuahua	36	Jiménez	1	José Mariano Jiménez	35087	97.7233	-2.62683	21.9268	1.28068
586	2205 Valle de Tequisquiapan	Querétaro	2205	176	VALLE DE TEQUISQUIAPAN	Golfo Norte	124259	875.761	Querétaro	7	Ezequiel Montes	1	Ezequiel Montes	16795	5.85572	-2.56565	108.066	0.613017
168	0329 San Juan B. Londó	Baja California Sur	329	625	SAN JUAN B. LONDO	Península de Baja California	115209	874.078	Baja California Sur	9	Loreto	1	Loreto	16311	26.2841	-2.34791	8.04791	0.595352
285	2407 Cedral - Matehuala	San Luis Potosí	2407	155	CEDRAL-MATEHUALA	Cuencas Centrales del Norte	234787	2370.46	San Luis Potosí	7	Cedral	1	Cedral	12807	8.8556	-2.28332	18.4833	0.467456
230	1446 Cuquio	Jalisco	1446	274	CUQUIO	Lerma Santiago Pacífico	154668	1072.07	Jalisco	45	Ixtlahuacán del Río	1	Ixtlahuacán del Río	6882	8.26399	-2.18422	12.5842	0.251193
288	2410 Buenavista	San Luis Potosí	2410	160	BUENAVISTA	Golfo Norte	489186	7256.13	Tamaulipas	39	Tula	1	Ciudad Tula	10977	37.1208	-2.09393	29.1939	0.40066
290	2412 Jaral de Berrios - Villa de Reyes	San Luis Potosí	2412	162	JARAL DE BERRIOS-VILLA DE REYES	Cuencas Centrales del Norte	228769	2708.15	Guanajuato	30	San Felipe	211	San Bartolo de Berrios	7133	12.6351	-2.03646	132.836	0.260354
14	2803 Hidalgo - Villagrán	Tamaulipas	2803	618	HIDALGO-VILLAGRAN	Golfo Norte	333652	4650.28	Tamaulipas	16	Hidalgo	145	Estación Santa Engracia	6121	46.6933	-2.01879	36.0188	0.223416
234	1450 San Isidro	Jalisco	1450	271	SAN ISIDRO	Lerma Santiago Pacífico	104719	439.566	Jalisco	97	Tlajomulco de Zúñiga	34	Santa Cruz de las Flores	12233	6.25472	-1.98062	46.5806	0.446505
333	1911 Cañón del Huajuco	Nuevo León	1911	209	CAÑON DEL HUAJUCO	Río Bravo	64348.2	292.353	Nuevo León	49	Santiago	1	Santiago	43019	7.61478	-1.9272	28.7272	1.57019
143	0304 La Purísima	Baja California Sur	304	534	LA PURISIMA	Península de Baja California	320152	6037.46	Baja California Sur	9	Loreto	1	Loreto	16311	67.6601	-1.90073	2.60073	0.595352
217	1433 Cihuatlán	Jalisco	1433	295	CIHUATLAN	Lerma Santiago Pacífico	134100	522.99	Jalisco	22	Cihuatlán	1	Cihuatlán	18787	8.54387	-1.80668	39.2067	0.685725
188	1404 Poncitlán	Jalisco	1404	273	PONCITLAN	Lerma Santiago Pacífico	97082.7	639.873	Jalisco	66	Poncitlán	1	Poncitlán	14636	4.59753	-1.69741	31.0974	0.534214
17	2806 Márgenes del Río Purificación	Tamaulipas	2806	616	MARGENES DEL RIO PURIFICACION	Golfo Norte	107956	785.858	Tamaulipas	30	Padilla	1	Nueva Villa de Padilla	5531	9.20638	-1.696	104.696	0.201881
388	1503 Polotitlán	Estado de México	1503	266	POLOTITLAN	Golfo Norte	220888	1518.02	México	1	Acambay de Ruíz Castañeda	1	Villa de Acambay de Ruíz Castañeda	5988	11.2878	-1.62925	13.0292	0.218562
341	1919 Campo Cerritos	Nuevo León	1919	205	CAMPO CERRITOS	Río Bravo	45982.4	129.318	Nuevo León	12	Ciénega de Flores	1	Ciénega de Flores	30217	10.8135	-1.53959	4.53959	1.10292
47	1022 Villa Juárez	Durango	1022	412	VILLA JUAREZ	Cuencas Centrales del Norte	211864	1812.63	Durango	12	Lerdo	57	Ciudad Juárez	7643	11.6652	-1.48851	44.2885	0.278969
596	2604 Arroyo Sahuaro	Sonora	2604	113	ARROYO SAHUARO	Noroeste	259508	4156.37	Sonora	17	Caborca	246	Plutarco Elías Calles (La Y Griega)	5159	51.719	-1.48761	9.08761	0.188304
331	1909 Campo Durazno	Nuevo León	1909	211	CAMPO DURAZNO	Río Bravo	133660	1159.5	Nuevo León	18	García	1	García	234698	7.21039	-1.48042	11.0804	8.56648
172	0333 San Marcos - Palo Verde	Baja California Sur	333	532	SAN MARCOS-PALO VERDE	Península de Baja California	161437	1202.52	Baja California Sur	2	Mulegé	1	Santa Rosalía	14357	36.4113	-1.46795	3.36795	0.52403
390	1505 Villa Victoria - Valle de Bravo	Estado de México	1505	621	VILLA VICTORIA-VALLE DE BRAVO	Balsas	258705	2420.87	México	32	Donato Guerra	17	San Simón de la Laguna	5894	0.531668	-1.46627	4.86627	0.215131
191	1407 Aguacate	Jalisco	1407	292	AGUACATE	Lerma Santiago Pacífico	82764.6	397.606	Jalisco	79	Gómez Farías	30	San Andrés Ixtlán	5768	12.5628	-1.4506	17.5506	0.210532
506	1604 Lagunillas Pátzcuaro	Michoacán	1604	247	LAGUNILLAS PATZCUARO	Lerma Santiago Pacífico	143117	1309.66	Michoacán de Ocampo	66	Pátzcuaro	1	Pátzcuaro	60811	7.11734	-1.33658	13.9366	2.2196
454	0860 Guerrero - Yepómera	Chihuahua	860	451	GUERRERO-YEPOMERA	Noroeste	403104	6516.11	Chihuahua	31	Guerrero	1	Vicente Guerrero	7834	4.23976	-1.3303	147.33	0.285941
546	3217 El Palmar	Zacatecas	3217	25	EL PALMAR	Cuencas Centrales del Norte	419559	8962.82	Zacatecas	14	General Francisco R. Murguía	1	Nieves	5844	11.1774	-1.32898	73.629	0.213306
157	0318 Cabo Pulmo	Baja California Sur	318	540	CABO PULMO	Península de Baja California	136963	754.451	Baja California Sur	8	Los Cabos	1	San José del Cabo	136285	32.4636	-1.31494	1.61494	4.9744
5	0608 Jalipa - Tapeixtles	Colima	608	423	JALIPA-TAPEIXTLES	Lerma Santiago Pacífico	45951.6	68.361	Colima	7	Manzanillo	21	El Colomo	9664	4.10411	-1.31242	9.11242	0.352736
43	1018 Peñón Blanco	Durango	1018	410	PEÑON BLANCO	Cuencas Centrales del Norte	258446	3122.93	Durango	21	Peñón Blanco	1	Peñón Blanco	5911	9.11423	-1.23453	12.9345	0.215752
442	0848 Laguna de Palomas	Chihuahua	848	497	LAGUNA DE PALOMAS	Río Bravo	185226	2090.79	Chihuahua	36	Jiménez	1	José Mariano Jiménez	35087	88.0586	-1.12188	24.2219	1.28068
152	0313 Todos Santos	Baja California Sur	313	641	TODOS SANTOS	Península de Baja California	65252	243.313	Baja California Sur	3	La Paz	3	Todos Santos	7185	7.92338	-1.09704	4.79704	0.262252
195	1411 El Muerto	Jalisco	1411	291	EL MUERTO	Lerma Santiago Pacífico	37628.3	102.389	Jalisco	53	Lagos de Moreno	1	Lagos de Moreno	111569	11.5477	-1.05901	3.65901	4.07227
19	2808 Victoria - Casas	Tamaulipas	2808	56	VICTORIA-CASAS	Golfo Norte	316450	5079.3	Tamaulipas	41	Victoria	1	Ciudad Victoria	332100	44.8243	-0.91155	29.7115	12.1217
204	1420 Jiquilpan	Jalisco	1420	289	JIQUILPAN	Lerma Santiago Pacífico	50706.6	185.39	Jalisco	113	San Gabriel	1	San Gabriel	5109	7.33371	-0.811311	7.11131	0.186478
93	2007 Tehuantepec	Oaxaca	2007	200	TEHUANTEPEC	Pacífico Sur	688701	15280.3	Oaxaca	418	Santa María Jalapa del Marqués	1	Santa María Jalapa del Marqués	8958	26.2123	-0.770373	39.256	0.326967
422	0828 Los Moscos	Chihuahua	828	485	LOS MOSCOS	Río Bravo	169780	1490.46	Chihuahua	5	Ascensión	1	Ascensión	15054	48.548	-0.7667	38.4667	0.549471
549	3220 Guadalupe Garzarón	Zacatecas	3220	31	GUADALUPE GARZARON	Cuencas Centrales del Norte	343692	4832.87	Zacatecas	7	Concepción del Oro	1	Concepción del Oro	6915	32.6516	-0.755706	20.3557	0.252397
410	0816 Aldama - El Cuervo	Chihuahua	816	477	ALDAMA-EL CUERVO	Río Bravo	299715	4998.08	Chihuahua	52	Ojinaga	1	Manuel Ojinaga	22066	107.14	-0.74763	18.8524	0.805409
221	1437 Tequila	Jalisco	1437	312	TEQUILA	Lerma Santiago Pacífico	166069	1118.06	Jalisco	55	Magdalena	1	Magdalena	16873	14.8422	-0.63242	19.9324	0.615865
509	1607 Cienéga de Chapala	Michoacán	1607	258	CIENEGA DE CHAPALA	Lerma Santiago Pacífico	236814	1824.16	Michoacán de Ocampo	76	Sahuayo	1	Sahuayo de Morelos	70042	0.927931	-0.626265	98.8263	2.55653
405	0811 Las Palmas	Chihuahua	811	487	LAS PALMAS	Río Bravo	220127	2338.27	Chihuahua	5	Ascensión	68	Puerto Palomas de Villa	6054	25.9023	-0.61191	4.21191	0.220971
277	0104 Venadero	Aguascalientes	104	589	VENADERO	Lerma Santiago Pacífico	42819.4	130.887	Aguascalientes	1	Aguascalientes	1025	Pocitos	8494	17.7677	-0.59685	1.59685	0.310031
299	1702 Cuautla - Yautepec	Morelos	1702	238	CUAUTLA-YAUTEPEC	Balsas	268887	2872.35	Morelos	6	Cuautla	1	Cuautla	157336	1.35199	-0.5198	93.1198	5.74276
173	0334 San Bruno	Baja California Sur	334	531	SAN BRUNO	Península de Baja California	43959.1	139.3	Baja California Sur	2	Mulegé	1	Santa Rosalía	14357	26.587	-0.51902	1.11902	0.52403
396	0802 Alta Babícora	Chihuahua	802	461	ALTA BABICORA	Río Bravo	206906	2552.08	Chihuahua	40	Madera	1	Madera	14755	33.3596	-0.4665	41.4665	0.538558
556	3227 Guadalupe Bañuelos	Zacatecas	3227	0	GUADALUPE BAÑUELOS	Cuencas Centrales del Norte	76227.9	346.249	Zacatecas	17	Guadalupe	9	Cieneguitas	5586	6.25608	-0.4541	12.5541	0.203889
95	2009 Río Verde - Ejutla	Oaxaca	2009	185	RIO VERDE-EJUTLA	Pacífico Sur	134002	668.447	Oaxaca	28	Heroica Ciudad de Ejutla de Crespo	1	Heroica Ciudad de Ejutla de Crespo	11168	9.79233	-0.453725	5.45834	0.407632
2	0603 Armería - Tecomán - Periquillos	Colima	603	427	ARMERIA-TECOMAN-PERIQUILLOS	Lerma Santiago Pacífico	189667	1594.9	Colima	9	Tecomán	11	Colonia Bayardo	5393	6.83095	-0.436575	210.437	0.196845
125	0514 Hidalgo	Coahuila	514	646	HIDALGO	Río Bravo	225177	2147.93	Nuevo León	5	Anáhuac	1	Anáhuac	16414	66.6878	-0.374281	4.17428	0.599111
521	1619 Ostula	Michoacán	1619	262	OSTULA	Lerma Santiago Pacífico	404085	7374.93	Michoacán de Ocampo	15	Coalcomán de Vázquez Pallares	1	Coalcomán de Vázquez Pallares	13806	31.8597	-0.353881	4.85388	0.503919
222	1438 Colomos	Jalisco	1438	299	COLOMOS	Balsas	330720	3745.52	Michoacán de Ocampo	89	Tepalcatepec	1	Tepalcatepec	17293	28.8813	-0.3139	18.2139	0.631194
237	1453 Los Puentes	Jalisco	1453	323	LOS PUENTES	Lerma Santiago Pacífico	172463	509.294	Jalisco	45	Ixtlahuacán del Río	1	Ixtlahuacán del Río	6882	20.3629	-0.291517	6.19152	0.251193
149	0310 Melitón Albañez	Baja California Sur	310	638	MELITON ALBAÑEZ	Península de Baja California	76892	432.408	Baja California Sur	3	La Paz	92	El Centenario	6221	40.2902	-0.2655	2.3655	0.227067
420	0826 Los Lamentos	Chihuahua	826	478	LOS LAMENTOS	Río Bravo	211998	3108.56	Chihuahua	1	Ahumada	1	Miguel Ahumada	10510	78.8536	-0.23131	9.93131	0.383615
219	1435 Amatitán	Jalisco	1435	288	AMATITAN	Lerma Santiago Pacífico	76361.5	285.471	Jalisco	94	Tequila	1	Tequila	31115	5.25467	-0.230829	9.93083	1.1357
598	2606 Los Chirriones	Sonora	2606	83	LOS CHIRRIONES	Noroeste	214769	3098.09	Sonora	17	Caborca	1	Heroica Caborca	67604	56.3704	-0.2265	28.2265	2.46755
175	0336 Santa Águeda	Baja California Sur	336	529	SANTA AGUEDA	Península de Baja California	114371	622.512	Baja California Sur	2	Mulegé	1	Santa Rosalía	14357	21.402	-0.196793	0.396793	0.52403
213	1429 Tizapán	Jalisco	1429	315	TIZAPAN	Lerma Santiago Pacífico	136555	485.667	Jalisco	96	Tizapán el Alto	1	Tizapán el Alto	16324	12.3787	-0.171802	13.9718	0.595826
144	0305 Mezquital Seco	Baja California Sur	305	516	MEZQUITAL SECO	Península de Baja California	162049	1185.38	Baja California Sur	9	Loreto	1	Loreto	16311	53.8579	-0.16907	1.96907	0.595352
633	2641 Cocoraque	Sonora	2641	118	COCORAQUE	Noroeste	271395	3282.3	Sonora	18	Cajeme	334	Marte R. Gómez (Tobarito)	8473	25.0341	-0.1689	178.369	0.309264
174	0335 San Lucas	Baja California Sur	335	530	SAN LUCAS	Península de Baja California	54741.2	178.874	Baja California Sur	2	Mulegé	1	Santa Rosalía	14357	18.5768	-0.13483	0.23483	0.52403
141	0302 Vizcaíno	Baja California Sur	302	515	VIZCAINO	Península de Baja California	544159	14721.5	Baja California Sur	2	Mulegé	482	Villa Alberto Andrés Alvarado Arámburo	10897	39.2463	-0.1294	37.8294	0.39774
224	1440 Valle de Juárez	Jalisco	1440	316	VALLE DE JUAREZ	Lerma Santiago Pacífico	40430.7	95.0268	Jalisco	59	Mazamitla	1	Mazamitla	8142	6.11165	-0.09715	3.69715	0.297183
151	0312 Cañada Honda	Baja California Sur	312	639	CAÑADA HONDA	Península de Baja California	94700.4	565.399	Baja California Sur	3	La Paz	3	Todos Santos	7185	18.8488	-0.08243	1.08243	0.262252
255	1116 Valle de La Cuevita	Guanajuato	1116	387	VALLE DE LA CUEVITA	Lerma Santiago Pacífico	125694	901.095	Guanajuato	19	Jerécuaro	1	Jerécuaro	8011	13.4618	-0.065163	9.66515	0.292401
587	2206 Valle de Cadereyta	Querétaro	2206	175	VALLE DE CADEREYTA	Golfo Norte	125532	530.874	Querétaro	4	Cadereyta de Montes	1	Cadereyta de Montes	15512	11.2133	-0.042	4.142	0.566188
620	2628 Río Bacanuchi	Sonora	2628	90	RIO BACANUCHI	Noroeste	184926	2396.91	Sonora	19	Cananea	1	Heroica Ciudad de Cananea	38113	36.6158	-0.0389	12.9389	1.39112
524	1622 Cotija	Michoacán	1622	252	COTIJA	Balsas	250966	2507.53	Michoacán de Ocampo	95	Tocumbo	40	Santa Clara de Valladares	7785	3.5068	-0.0175	42.1175	0.284152
146	0307 Santa Rita	Baja California Sur	307	517	SANTA RITA	Península de Baja California	262390	2510.5	Baja California Sur	1	Comondú	1	Ciudad Constitución	43805	57.6547	-0.00887	1.20887	1.59888
154	0315 Plutarco Elías Calles	Baja California Sur	315	539	PLUTARCO ELIAS CALLES	Península de Baja California	83666.2	463.005	Baja California Sur	3	La Paz	3	Todos Santos	7185	31.9659	-0.00334	1.00334	0.262252
67	1213 La Unión	Guerrero	1213	367	LA UNION	Balsas	205169	2323.83	Guerrero	38	Zihuatanejo de Azueta	13	San José Ixtapa (Barrio Viejo)	8988	40.4605	-0.002256	19.0023	0.328062
409	0815 Laguna El Diablo	Chihuahua	815	488	LAGUNA EL DIABLO	Río Bravo	93965.7	404.166	Chihuahua	2	Aldama	1	Juan Aldama	22568	36.8678	-0.001027	0.201027	0.823732
